# Supplementary material for: Ultraviolet sensing using a TiO2nanotube integrated high resolution planar microwave resonator device
Source: Royal Society of Chemistry journal article supplement (doi:10.1039/c7nr06869g), 2018-01-01
Supplement: c7nr06869g1.pdf [file c7nr06869g1.pdf]

## Supplementary Information

# Ultraviolet Sensing Using TiO<sub>2</sub> Nanotube Integrated High Resolution Planar Microwave Resonator Device

Mohammad H. Zarifi<sup>1†</sup>, Benjamin Wiltshire<sup>2</sup>, Najia Mahdi<sup>2</sup>, Piyush Kar<sup>2</sup>, Karthik Shankar<sup>2†</sup> and Mojgan Daneshmand<sup>2†</sup>

<sup>1</sup>School of Engineering, University of British Columbia, Canada, V1V 1V7

<sup>2</sup>Department of Electrical and Computer Engineering, University of Alberta, Canada, T6G 1H9

† Corresponding authors' E-mail: mohammad.zarifi@ubc.ca, kshankar@ualberta.ca, Daneshmand@ualberta.ca.

## TiO<sub>2</sub> Membrane Preparation and Characterization

Titanium foils with 0.79 mm thickness (99.7%; Sigma Aldrich) were degreased by sonication in methanol and deionized water (DI) and then dried in a flowing stream of nitrogen gas. A conventional two-electrode electrochemical cell was used for anodization of TiO<sub>2</sub> nanotubes with dimensions of 1 × 4 cm and 0.5 × 4 cm for anode and cathode respectively. A reference TiO<sub>2</sub> nanotube array sample was formed by anodizing Ti foil in an electrolyte consisting of 0.1 M ammonium fluoride and 5% vol. DI water in ethylene glycol (EG) at 60 V. In comparison, a TiO<sub>2</sub> nanotube membrane was anodized with an electrolyte consisting of 1.5 M lactic acid, 0.1 M ammonium fluoride, and 5% vol. DI water in EG to improve the rate of anodization and thus obtain longer nanotubes in shorter time. In mechanical terms, the factor that determines the growth rate in a classic high field anodization process is a high driving voltage that is established across the growing oxide without causing local dielectric breakdown events such as burning [1,2]. Among all the other factors, the threshold voltage for 'burning' depends on the electrolyte's ionic species such as citric acid, malonic acid, oxalic acid, and lactic acid. These weak organic acids shift the threshold voltage to a higher value which leads to more rapid anodization process [3, 4]. Furthermore, the incorporation of carbon into the walls of the nanotubes due to anodization in

organic electrolytes decreases the permittivity and increases the critical breakdown field [5]. Unlike the TiO<sub>2</sub> anodization reference electrolyte, the 1.5 M lactic acid electrolyte needed adjustments such as cooling down the electrochemical cell with ice due to the high cell currents resulting from the use of a high anodization voltage. After a few experimental anodization processes, the anodization process with an initial applied voltage of 120 V for three minutes followed by 100 V for 1 hour in a glass beaker cell gave the best results in terms of TiO<sub>2</sub> nanotube formation, thickness and anodization current control. The as-prepared TiO<sub>2</sub> nanotubes on foil were then annealed in air at 500° C for 2 hours. The TiO<sub>2</sub> nanotubes on foil were then anodized for a second time in a regular electrolyte to form an amorphous thin layer of TiO<sub>2</sub> under the anatase TiO<sub>2</sub> nanotube layer. The difference between the TiO<sub>2</sub> NT phases caused a tension between the two layers and as a result, a free standing TiO<sub>2</sub> nanotube membrane with a thickness of 19 μm was formed. When compared to the regular EG-based electrolyte, the lactic acid based electrolyte more than doubled the growth rate of TiO<sub>2</sub> nanotubes. A regular electrolyte produced TiO<sub>2</sub> NT films with a thickness of 19 μm in about 2.5 hours but the lactic acid recipe produced the same length of TiO<sub>2</sub> NTs in 1 hour.

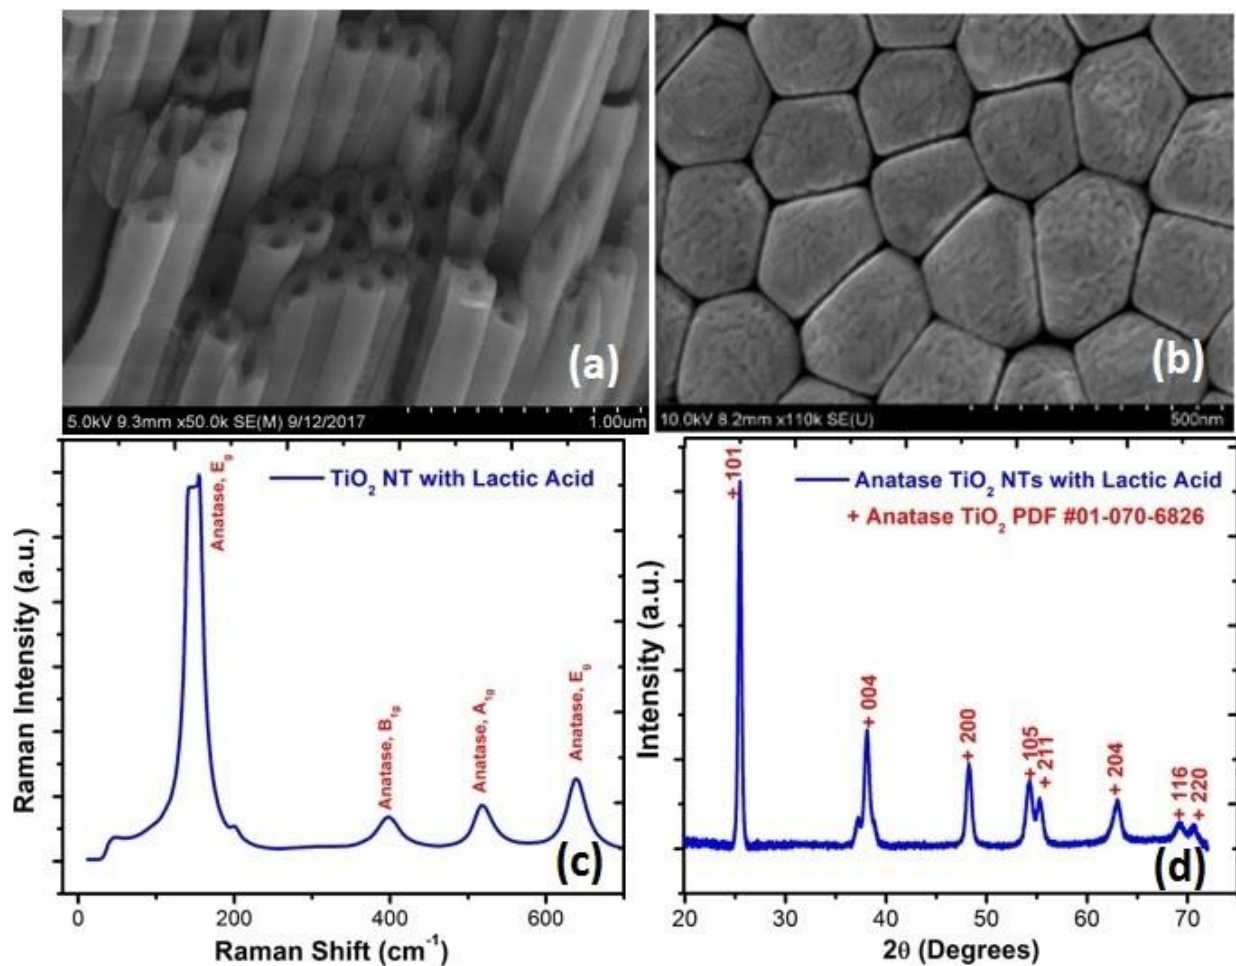

**Figure S1** (a) FESEM image of a cross section of a grown TiO<sub>2</sub> nanotube layer. (b) The barrier layer of TiO<sub>2</sub> NTs anodized with a lactic acid electrolyte. The wrinkles on the barrier layer provide indirect confirmation of the high surface area of the TiO<sub>2</sub> NTs (c) The Raman Spectroscopy plot of TiO<sub>2</sub> NTs. (d) The X-ray diffractogram of TiO<sub>2</sub> NTs indicating the presence of anatase phase.

A field emission scanning electron microscope (Hitachi S-4800 FESEM) was used to image the nanotube arrays. X-ray diffraction (Bruker D8 X-Ray Diffractometer) was used to identify the phase of the crystalline TiO<sub>2</sub> NTA and to provide information on unit cell dimensions. The Raman Spectroscopy (Nicolet Omega XR Raman Microscope) was used to study the chemical composition and the bond signature of the TiO<sub>2</sub> NTA. (Figure S1).

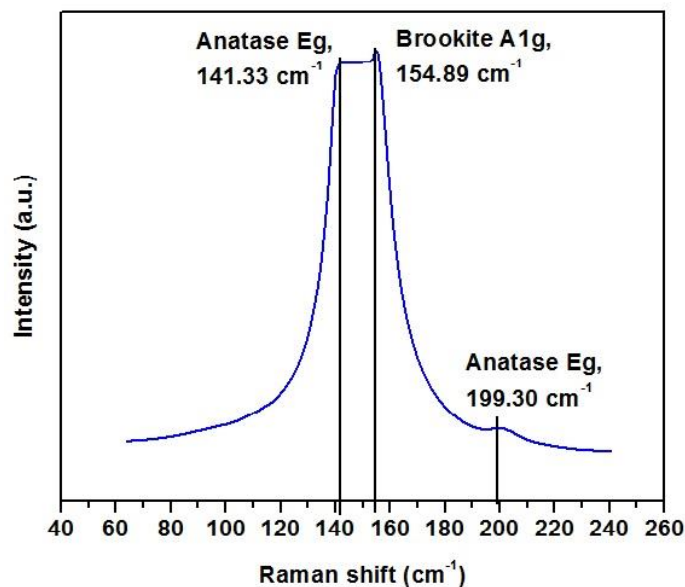

**Figure S2.** Zoomed in view of Raman spectrum between  $60\text{ cm}^{-1}$  and  $240\text{ cm}^{-1}$

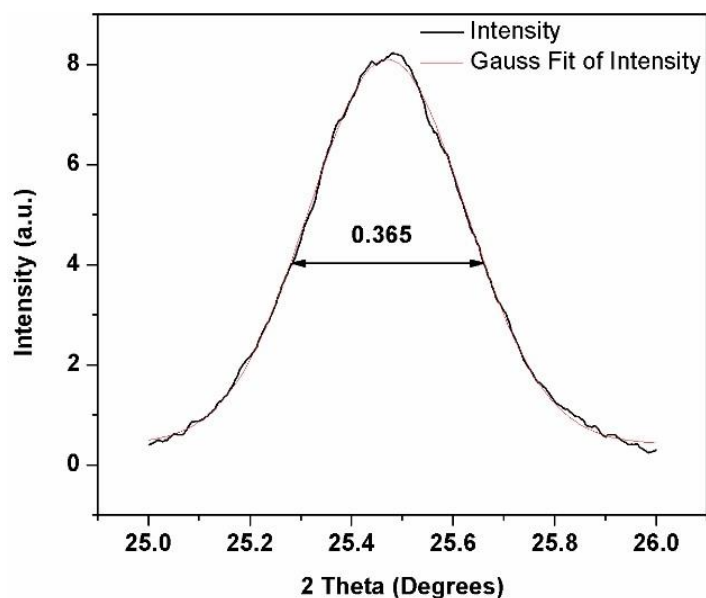

**Figure S3.** Zoomed in view of the anatase (101) XRD peak of the  $\text{TiO}_2$  nanotube arrays

The Raman mode at  $154.89\text{ cm}^{-1}$  (Fig. S2) can be due to the anatase  $E_g$  mode that is caused by small (less than 4 nm) crystallite size of anatase [6]. However, that is ruled out, based on our Scherer analysis, see the Fig. S2 (FWHM for anatase (101) peak), for which crystallite size is 28 nm. The peak at  $154.89\text{ cm}^{-1}$  can also be due to presence of brookite  $A_{1g}$  [7]. By ruling out anatase  $E_g$  because of large crystallite size, we attribute the Raman mode at  $154.89\text{ cm}^{-1}$  to brookite  $A_{1g}$ .

## References:

- [1] S. So, K. Lee and P. Schmuki, *J. Am. Chem. Soc.*, 2012, **134**, 11316-11318.
- [2] H. E. Prakasam, K. Shankar, M. Paulose, O. K. Varghese and C. A. Grimes, *J. Phys. Chem. C*, 2007, **111**, 7235-7241.
- [3] S. Ono, M. Saito and H. Asoh, *Electrochem. Solid-State Lett.*, 2004, **7**, B21-B21.
- [4] S. Ono, M. Saito and H. Asoh, *Electrochim. Acta*, 2005, **51**, 827-833.
- [5] S. Karthik, K. M. Gopal, E. P. Haripriya, Y. Sorachon, P. Maggie, K. V. Oomman and A. G. Craig, *Nanotechnology*, 2007, **18**, 065707.
- [6] Kaniyankandy, S. and Ghosh, H.N., 2009. Efficient luminescence and photocatalytic behaviour in ultrafine TiO<sub>2</sub> particles synthesized by arrested precipitation. *Journal of Materials Chemistry*, 19(21), pp.3523-3528.
- [7] Silva, N.R., Cid, C.C.P., Spada, E.R., Reis, F.T., Faria, R.M. and Sartorelli, M.L., 2014. Electrosynthesized TiO<sub>2</sub> films: dependence of the brookite–anatase ratio on the applied potential. *Journal of materials science*, 49(7), pp.2952-2959.
